# Supplementary material
Source: PubMed Central journal article supplement (PMC5846188)
Supplement: NIHMS947293-supplement-Sata_Suppl_Info.pdf [file NIHMS947293-supplement-Sata_Suppl_Info.pdf]

# ASCO | GUIDELINES

## Data Supplement

**TITLE: USE OF BIOMARKERS TO GUIDE DECISIONS ON ADJUVANT SYSTEMIC THERAPY FOR WOMEN WITH EARLY-STAGE INVASIVE BREAST CANCER: FOCUSED UPDATE OF 2016 AMERICAN SOCIETY OF CLINICAL ONCOLOGY CLINICAL PRACTICE GUIDELINE**

### Table of Contents

#### Data Supplement 1

- Table 1: Key Definitions and Evidentiary Requirements
- Table 2: Clinical risk assessment by the modified version of Adjuvant! Online
- Table 3: Evidentiary requirement of studies for MammaPrint
- Table 4: Summary of recommendations

#### Data Supplement 2: Evidence Tables

- Table 5. Study characteristics
- Table 6. Quality of studies
- Table 7. Outcomes of interest

#### References

## Data Supplement 1

**Table 1: Key Definitions and Evidentiary Requirements**

| <b>Term</b>       | <b>Definition</b>                                                                                                                                                                                                                                                                                     | <b>Evidentiary Requirements</b>                                                                                                                                                                                                                                                                                                                                                                                                   |
|-------------------|-------------------------------------------------------------------------------------------------------------------------------------------------------------------------------------------------------------------------------------------------------------------------------------------------------|-----------------------------------------------------------------------------------------------------------------------------------------------------------------------------------------------------------------------------------------------------------------------------------------------------------------------------------------------------------------------------------------------------------------------------------|
| analytic validity | The ability to accurately and reliably measure the analyte of interest (e.g., metabolites, proteins, nucleic acids, specific mutations, antigens, etc.) in the clinical laboratory, and in tissue or fluid specimens obtained from patients with the same disease & stage as those who will be tested | <ul style="list-style-type: none"><li>• analytic sensitivity &amp; range (detection rate)</li><li>• analytic specificity (1-false positive rate)</li><li>• Reliability of test results</li><li>• assay robustness (analyte stability to pre-analytic &amp; analytic methods)</li><li>• QA, QC, &amp; proficiency testing data</li><li>• for new assays and test platforms, comparison to “gold standard”</li></ul>                |
| clinical validity | The ability to accurately and reliably predict the clinically defined disorder, phenotype, or outcome of interest.                                                                                                                                                                                    | <ul style="list-style-type: none"><li>• clinical sensitivity &amp; specificity</li><li>• positive and negative predictive values using valid estimates of prevalence</li><li>• ROC curve (if appropriate)</li></ul>                                                                                                                                                                                                               |
| clinical utility  | The use of test results to guide clinical decisions improves measurable clinical outcomes of patient management, compared with outcomes of management decisions independent of test results                                                                                                           | <ul style="list-style-type: none"><li>• Direct comparison of outcomes from management decisions consistent with test results versus outcomes of decisions independent of test results</li><li>• Hierarchy of study designs:<ul style="list-style-type: none"><li>○ systematic reviews or meta-analyses</li><li>○ RCTs</li><li>○ prospective-retrospective studies</li><li>○ comparative observational studies</li></ul></li></ul> |

Adapted from Teutsch, et al. 2009<sup>1</sup>

**Table 2: Classification of patients according to clinical risk assessment by the modified version of Adjuvant!Online as reported by Cardoso et al, 2016<sup>2</sup>**

| ER status                                 | HER2 status                               | Grade                                                                  | Nodal status       | Tumor Size | Clinical Risk in Mindact |
|-------------------------------------------|-------------------------------------------|------------------------------------------------------------------------|--------------------|------------|--------------------------|
| ER positive                               | HER2 negative                             | well differentiated                                                    | N-                 | ≤ 3 cm     | C-low                    |
|                                           |                                           |                                                                        |                    | 3.1-5 cm   | C-high                   |
|                                           |                                           |                                                                        | 1-3 positive nodes | ≤ 2 cm     | C-low                    |
|                                           |                                           |                                                                        | 2.1-5 cm           | C-high     |                          |
|                                           |                                           | moderately differentiated                                              | N-                 | ≤ 2 cm     | C-low                    |
|                                           |                                           |                                                                        |                    | 2.1-5 cm   | C-high                   |
|                                           | 1-3 positive nodes                        |                                                                        | Any size           | C-high     |                          |
|                                           | poorly differentiated or undifferentiated | N-                                                                     | ≤ 1 cm             | C-low      |                          |
|                                           |                                           |                                                                        | 1.1-5 cm           | C-high     |                          |
|                                           |                                           | 1-3 positive nodes                                                     | Any size           | C-high     |                          |
|                                           | HER2 positive                             | well differentiated OR moderately differentiated                       | N-                 | ≤ 2 cm     | C-low                    |
|                                           |                                           |                                                                        |                    | 2.1-5 cm   | C-high                   |
| 1-3 positive nodes                        |                                           |                                                                        | Any size           | C-high     |                          |
| poorly differentiated or undifferentiated |                                           | N-                                                                     | ≤ 1 cm             | C-low      |                          |
|                                           |                                           |                                                                        | 1.1-5 cm           | C-high     |                          |
|                                           |                                           | 1-3 positive nodes                                                     | Any size           | C-high     |                          |
| ER negative                               | HER2 negative                             | well differentiated                                                    | N-                 | ≤ 2 cm     | C-low                    |
|                                           |                                           |                                                                        |                    | 2.1-5 cm   | C-high                   |
|                                           |                                           |                                                                        | 1-3 positive nodes | Any size   | C-high                   |
|                                           |                                           | moderately differentiated OR poorly differentiated or undifferentiated | N-                 | ≤ 1 cm     | C-low                    |
|                                           |                                           |                                                                        |                    | 1.1-5 cm   | C-high                   |
|                                           |                                           |                                                                        | 1-3 positive nodes | Any size   | C-high                   |
|                                           | HER2 positive                             | well differentiated OR moderately differentiated                       | N-                 | ≤ 1 cm     | C-low                    |
|                                           |                                           |                                                                        |                    | 1.1-5 cm   | C-high                   |
|                                           |                                           | 1-3 positive nodes                                                     | Any size           | C-high     |                          |
|                                           |                                           | poorly differentiated or undifferentiated                              | Any                | Any size   | C-high                   |

**Table 3: Evidentiary requirement of studies for MammaPrint**

| Use Context                                                                                                                                   | Marker test                 | Study                                                                | Category of evidence <sup>1</sup> | Level of evidence <sup>1</sup> | Analytical validity <sup>2</sup> | Clinical validity | Clinical utility |
|-----------------------------------------------------------------------------------------------------------------------------------------------|-----------------------------|----------------------------------------------------------------------|-----------------------------------|--------------------------------|----------------------------------|-------------------|------------------|
| <b>Patient Group:</b><br>Node negative<br>ER Positive<br>HER2 negative<br><b>Use:</b><br>With-hold<br>adjuvant<br>chemotherapy<br>(prognosis) | 70 gene assay (MammaPrint®) | Cardoso et al, (NEJM 2016) <sup>2</sup>                              | A                                 | 1                              | +                                | +                 | +                |
|                                                                                                                                               |                             | Buyse et al, (J Natl Cancer Inst 2006) <sup>4</sup>                  | D                                 |                                |                                  |                   |                  |
|                                                                                                                                               |                             | Mook et al, (Breast Cancer Res Treat 2009) <sup>5</sup>              | D                                 |                                |                                  |                   |                  |
|                                                                                                                                               |                             | Bueno-de-Mesquita et al, (Breast Cancer Res Treat 2009) <sup>6</sup> | D                                 |                                |                                  |                   |                  |
|                                                                                                                                               |                             | Knauer et al, (B J Cancer 2010) <sup>7</sup>                         | D                                 |                                |                                  |                   |                  |
|                                                                                                                                               |                             | Knauer et al, (Breast Cancer Res Treat 2010) <sup>8</sup>            | D                                 |                                |                                  |                   |                  |
|                                                                                                                                               |                             | Drukker et al, (Breast Cancer Res Treat 2014) <sup>9</sup>           | C                                 |                                |                                  |                   |                  |

<sup>1</sup>per Simon RM, Paik S, Hayes DF: Use of archived specimens in evaluation of prognostic and predictive biomarkers. J Natl Cancer Inst 101:1446-52, 2009<sup>3</sup>

<sup>2</sup>+ = meets criteria for the column; - = does not meet criteria for the column; N/E = not evaluated

**Table 4: Recommendation Table**

| Marker                      | Specimen used                                                       | Test type               | Recommendations                                                                                                                                                                                                                                                                                                                                                                                                                   | Evidence rating                                                                                                                                                                    |
|-----------------------------|---------------------------------------------------------------------|-------------------------|-----------------------------------------------------------------------------------------------------------------------------------------------------------------------------------------------------------------------------------------------------------------------------------------------------------------------------------------------------------------------------------------------------------------------------------|------------------------------------------------------------------------------------------------------------------------------------------------------------------------------------|
| 70 gene assay (MammaPrint®) | Formalin-fixed paraffin-embedded tissues<br><br>Fresh frozen tissue | Gene expression profile | If a patient has <b>ER/PgR-positive, HER2-negative, node-negative</b> , breast cancer, the MammaPrint assay may be used in those with <b>high clinical risk</b> per MINDACT categorization to inform decisions on withholding adjuvant systemic chemotherapy due to its ability to identify a good prognosis population with potentially limited chemotherapy benefit.                                                            | <b>Type:</b> Evidence based<br><b>Quality of evidence:</b> High<br><b>Category of evidence:</b> A<br><b>Strength of recommendation:</b> Strong<br><b>Clinical Utility:</b> No      |
|                             |                                                                     |                         | If a patient has <b>ER/PgR-positive, HER2-negative, node-negative</b> , breast cancer, the MammaPrint assay <b>should not</b> be used in those with <b>low clinical risk</b> per MINDACT categorization to inform decisions on withholding adjuvant systemic chemotherapy as women in the low clinical risk category had excellent outcomes and did not appear to benefit from chemotherapy even with a genomic high risk cancer. | <b>Type:</b> Evidence based<br><b>Quality of evidence:</b> High<br><b>Category of evidence:</b> A<br><b>Strength of recommendation:</b> Strong<br><b>Clinical Utility:</b> No      |
|                             |                                                                     |                         | If a patient has <b>ER/PgR-positive, HER2-negative, node-positive</b> , breast cancer, the MammaPrint assay may be used in patients with 1-3 positive nodes and at <b>high clinical risk</b> per MINDACT categorization to inform decisions on withholding adjuvant systemic chemotherapy due to its ability to identify a good prognosis population with potentially limited chemotherapy benefit.                               | <b>Type:</b> Evidence based<br><b>Quality of evidence:</b> High<br><b>Category of evidence:</b> A<br><b>Strength of recommendation:</b> Moderate<br><b>Clinical Utility:</b> No    |
|                             |                                                                     |                         | If a patient has <b>ER/PgR-positive, HER2-negative, node-positive</b> , breast cancer, the MammaPrint assay <b>should not</b> be used in patients with 1-3 positive nodes and at <b>low clinical risk</b> per MINDACT                                                                                                                                                                                                             | <b>Type:</b> Informal consensus<br><b>Quality of evidence:</b> Low<br><b>Category of evidence:</b> D<br><b>Strength of recommendation:</b> Moderate<br><b>Clinical Utility:</b> No |

|  |  |  |                                                                                                                                                                                                                                                                                                                            |                                                                                                                                                                                                   |
|--|--|--|----------------------------------------------------------------------------------------------------------------------------------------------------------------------------------------------------------------------------------------------------------------------------------------------------------------------------|---------------------------------------------------------------------------------------------------------------------------------------------------------------------------------------------------|
|  |  |  | <p>categorization to inform decisions on withholding adjuvant systemic chemotherapy. There are insufficient data on the clinical utility of MammaPrint in this specific patient population.</p>                                                                                                                            |                                                                                                                                                                                                   |
|  |  |  | <p>If a patient has <b>HER2-positive</b> breast cancer, the clinician should not use the MammaPrint assay to guide decisions regarding adjuvant systemic therapy. Additional studies are required to address the role of MammaPrint in patients with this tumor subtype who are also receiving HER-2-targeted therapy.</p> | <p><b>Type:</b> Informal consensus<br/> <b>Quality of evidence:</b> Low<br/> <b>Category of evidence:</b> D<br/> <b>Strength of recommendation:</b> Moderate<br/> <b>Clinical Utility:</b> No</p> |
|  |  |  | <p>If a patient has ER/PgR negative and HER2-negative breast cancer (<b>triple negative</b>), the clinician should not use the MammaPrint assay to guide decisions about adjuvant systemic chemotherapy.</p>                                                                                                               | <p><b>Type:</b> Informal consensus<br/> <b>Quality of evidence:</b> Insufficient<br/> <b>Strength of recommendation:</b> Strong<br/> <b>Clinical Utility:</b> No</p>                              |

## Data Supplement 2

**Table 5. Characteristics of Studies with Evidence on Clinical Utility of Biomarkers to Guide Decisions on Treatment versus No Treatment for Patients Considering Adjuvant Therapy for Early-Stage Breast Cancer**

| Author Year Reference                                                                       | Assigned Treatments (N in each arm) | Marker Study Objective (& Tx) | Biomarker Subsets     | # and % of Pts. | Patient Characteristics           |                       |      |                      |                               | Disease Characteristics                                        |                                                              |                                                                                                    |                                           |
|---------------------------------------------------------------------------------------------|-------------------------------------|-------------------------------|-----------------------|-----------------|-----------------------------------|-----------------------|------|----------------------|-------------------------------|----------------------------------------------------------------|--------------------------------------------------------------|----------------------------------------------------------------------------------------------------|-------------------------------------------|
|                                                                                             |                                     |                               |                       |                 | Median Age                        | Menopausal Status (%) |      | Distribution by Race | Prior Neoadjuvant Therapy (%) | Stage                                                          | Tumor Size                                                   | Nodal Status                                                                                       | ER, PR, & HER2 status                     |
|                                                                                             |                                     |                               |                       |                 |                                   | pre                   | post |                      |                               |                                                                |                                                              |                                                                                                    |                                           |
| <b>Mammaprint: Randomized Controlled Trials</b>                                             |                                     |                               |                       |                 |                                   |                       |      |                      |                               |                                                                |                                                              |                                                                                                    |                                           |
| Cardoso et al, (NEJM 2016) <sup>2</sup>                                                     | NR/NA                               | Mammaprint                    | Low Risk<br>High Risk | 6693            | 55                                | NR                    | NR   | NR                   | NR                            | Grade 1: 1447<br>Grade 2: 3287<br>Grade 3: 1927<br>Missing: 32 | <1cm: 920<br>1 to 2 cm: 3875<br>>2 to 5 cm: 1819<br>>5cm: 20 | Node Negative: 5288<br><br>1 positive: 942<br>2 positive: 300<br>3 positive: 154<br>≥4 positive: 8 | ER+, PR+, or both: 5914<br><br>HER2+: 638 |
| <b>Mammaprint: Prospective Studies</b>                                                      |                                     |                               |                       |                 |                                   |                       |      |                      |                               |                                                                |                                                              |                                                                                                    |                                           |
| Drukker et al, (Breast Cancer Res Treat 2014) <sup>9</sup>                                  | CT (110)<br><br>ET (40)             | Mammaprint                    | Low Risk<br>High Risk | 295             | All patients were less than 53yrs | NR                    | NR   | NR                   | NR                            | Grade 1: 75<br>Grade 2: 101<br>Grade 3: 119                    | ≤20mm: 155<br>>20mm: 140                                     | 0: 151<br>1-3: 106<br>≥4: 38                                                                       | ER+: 226                                  |
| <b>Mammaprint: Retrospective Studies</b>                                                    |                                     |                               |                       |                 |                                   |                       |      |                      |                               |                                                                |                                                              |                                                                                                    |                                           |
| Knauer et al, (Breast Cancer Res Treat 2010) <sup>8</sup><br><br>Pooled data from 6 studies | ET (315)<br><br>ET + CT (226)       | Mammaprint                    | Low risk<br>High risk | 541 (100%)      | NR                                | NR                    | NR   | NR                   | 0                             | Grade 1: 134<br>Grade 2: 233<br>Grade 3: 163<br>n.a: 11        | T1: 279<br>T2: 254<br>T3: 7<br>n.a: 1                        | N0: 265<br>N1: 276                                                                                 | ER: 484<br>PR: 371<br>HER2: 59            |
| Buyse et al, (J Natl Cancer Inst 2006) <sup>4</sup>                                         | NR/NA                               | Mammaprint                    | Low Risk<br>High Risk | 307 (100%)      | NR                                | NR                    | NR   | NR                   | NR                            | Grade 1: 47<br>Grade 2: 125<br>Grade 3: 124<br>Unknown: 6      | T1ab: 11<br>T1c: 99<br>T2: 192                               | NR                                                                                                 | ER+: 212<br>ER-: 90                       |
| Mook et al, (Breast Cancer Res Treat 2009) <sup>5</sup>                                     | Mastectomy or breast-conserving     | Mammaprint                    | Good Signature        | 241 (100%)      | NR                                | NR                    | NR   | NR                   | NR                            | Grade 1: 57<br>Grade 2: 99                                     | pT1: 117<br>pT2: 121<br>pT3: 3                               | 1 positive node: 123<br>2 positive nodes: 77                                                       | ER+: 191<br>PR+: 151<br>HER2+: 37         |

| Author Year Reference                                                | Assigned Treatments (N in each arm)                                             | Marker Study Objective (& Tx) | Biomarker Subsets                    | # and % of Pts. | Patient Characteristics |                       |      |                      |                                | Disease Characteristics                   |                    |                      |                                   |
|----------------------------------------------------------------------|---------------------------------------------------------------------------------|-------------------------------|--------------------------------------|-----------------|-------------------------|-----------------------|------|----------------------|--------------------------------|-------------------------------------------|--------------------|----------------------|-----------------------------------|
|                                                                      |                                                                                 |                               |                                      |                 | Median Age              | Menopausal Status (%) |      | Distribution by Race | Prior Neo-adjuvant Therapy (%) | Stage                                     | Tumor Size         | Nodal Status         | ER, PR, & HER2 status             |
|                                                                      |                                                                                 |                               |                                      |                 |                         | pre                   | post |                      |                                |                                           |                    |                      |                                   |
|                                                                      | surgery followed by radiotherapy and adjuvant systemic therapy if indicated     |                               | Poor Signature                       |                 |                         |                       |      |                      |                                | Grade 3: 83<br>Unknown : 2                |                    | 3 positive nodes: 41 |                                   |
| Bueno-de-Mesquita et al, (Breast Cancer Res Treat 2009) <sup>6</sup> | Adjuvant Systemic Treatment<br><br>None (78)<br>CT (18)<br>ET (14)<br>Both (13) | Mammaprint                    | Good signature<br><br>Poor signature | 123 (100%)      | NR                      | NR                    | NR   | NR                   | NR                             | Grade 1: 20<br>Grade 2: 53<br>Grade 3: 50 | pT1: 76<br>pT2: 47 | NR                   | ER+: 94<br>PR+: 84<br>HER2+: 9    |
| Knauer et al, (B J Cancer 2010) <sup>7</sup>                         | No Chemotherapy or trastuzumab                                                  | Mammaprint                    | Good signature<br><br>Poor Signature | 168             | 49                      | NR                    | NR   | NR                   | 0                              | Grade 1/2: 65<br>Grade 3: 104             | T1: 89<br>T2/3: 79 | N0: 96<br>N1: 73     | ER+: 103<br>PR+: 70<br>HER2+: 168 |

Abbreviations: NR, not reported; ER, estrogen receptor; PR, progesterone receptor; HER2, human epidermal growth factor receptor 2; CT=Chemotherapy and Tamoxifen; ET=Endocrine Therapy; n.a=Not Available; NR=Not Reported



**Table 6. Quality of Studies Reporting Evidence of Clinical Utility of Biomarkers to Guide Decisions on Treatment versus No Treatment for Patients Considering Adjuvant Therapy for Early-Stage Breast Cancer**

| Author Year Reference                           | Provided details on randomization | Provided details on blinding | Provided details on any planned analysis | Expected effect size calculation and power calculation | Reported on length of follow-up | Reported on any differences in patient characteristics | Funding source | Overall Potential Risk of Bias <sup>a</sup> |
|-------------------------------------------------|-----------------------------------|------------------------------|------------------------------------------|--------------------------------------------------------|---------------------------------|--------------------------------------------------------|----------------|---------------------------------------------|
| <b>Mammaprint: Randomized Controlled Trials</b> |                                   |                              |                                          |                                                        |                                 |                                                        |                |                                             |
| Cardoso et al, (NEJM 2016) <sup>2</sup>         | √                                 | N/A                          | √                                        | √                                                      | √                               | √                                                      | √              | Low                                         |

| Author Year Reference                                                                   | Appropriate Study Design | Appropriate Study Population | Adequate Sample Size | Reproducible & Valid Assay Methods | Reliable & Valid Outcomes Measures | Adequate Follow-up | Appropriate Data Analysis Methods | Adequate Reporting of Results | Insignificant COI                                                                                                                          | Overall Potential Risk of Bias <sup>a</sup> |
|-----------------------------------------------------------------------------------------|--------------------------|------------------------------|----------------------|------------------------------------|------------------------------------|--------------------|-----------------------------------|-------------------------------|--------------------------------------------------------------------------------------------------------------------------------------------|---------------------------------------------|
| <b>Mammaprint: Prospective Studies</b>                                                  |                          |                              |                      |                                    |                                    |                    |                                   |                               |                                                                                                                                            |                                             |
| Drukker et al, (Breast Cancer Res Treat 2014) <sup>9</sup>                              | √                        | √                            | ?                    | √                                  | √                                  | √                  | √                                 | √                             | 2 of the authors are named inventors on the patent for the biomarker and 2 are also shareholders of the company that markets the biomarker | Intermediate                                |
| <b>Mammaprint: Retrospective Studies</b>                                                |                          |                              |                      |                                    |                                    |                    |                                   |                               |                                                                                                                                            |                                             |
| Knauer et al, (Breast Cancer Res Treat 2010) <sup>8</sup><br>Pooled data from 6 studies | √                        | √                            | ?                    | √                                  | √                                  | √                  | √                                 | √                             | 2 of the authors work for the company that manufactures the test                                                                           | Intermediate                                |
| Buyse et al, (J Natl Cancer Inst 2006) <sup>4</sup>                                     | √                        | √                            | √                    | √                                  | √                                  | √                  | √                                 | √                             | 1 of the authors are named inventors on the patent for the biomarker and 3 are also shareholders of the company that markets the biomarker | Intermediate                                |

|                                                                      |   |   |   |   |   |   |   |   |                                                                                                                                                                 |              |
|----------------------------------------------------------------------|---|---|---|---|---|---|---|---|-----------------------------------------------------------------------------------------------------------------------------------------------------------------|--------------|
| Mook et al, (Breast Cancer Res Treat 2009) <sup>5</sup>              | √ | √ | ? | √ | √ | √ | √ | √ | 1 of the authors is named inventor on the patent for the biomarker and also a shareholder and 2 employees of the company that markets the biomarker             | Intermediate |
| Bueno-de-Mesquita et al, (Breast Cancer Res Treat 2009) <sup>6</sup> | √ | √ | ? | √ | √ | √ | √ | √ | 3 of the authors are named inventors on the patent for the biomarker and one is a shareholder and 2 are employees of the company that markets the biomarker     | Intermediate |
| Knauer et al, (B J Cancer 2010) <sup>7</sup>                         | √ | √ | ? | √ | √ | √ | √ | √ | study was supported by the Breast Cancer Research Foundation and unrestricted educational grants from the Austrian Society of Surgery and Agendia BV, Amsterdam | Intermediate |

Note: √ indicates criterion was met; - indicates criterion was not met; ? indicates insufficient detail, not reported, and/or uncertain whether the criterion was met; NA, indicates not applicable.

<sup>a</sup> Ratings are based on assessment of whether the criterion was met and the extent of potential bias, not simply on reporting.

**Table 7. Outcomes of Interest from Studies with Evidence on Clinical Utility of Biomarkers to Guide Decisions on Treatment versus No Treatment for Patients Considering Adjuvant Therapy for Early-Stage Breast Cancer**

| Author Year Reference                                      | Treatments Compared | Biomarker(s) Investigated | # and % of Pts.                                                                   | Survival        |            |                   |         |                                                                                       |                                  |                   |                                                                                                                           |                                                                                                                           |                                                                                     |                                  |
|------------------------------------------------------------|---------------------|---------------------------|-----------------------------------------------------------------------------------|-----------------|------------|-------------------|---------|---------------------------------------------------------------------------------------|----------------------------------|-------------------|---------------------------------------------------------------------------------------------------------------------------|---------------------------------------------------------------------------------------------------------------------------|-------------------------------------------------------------------------------------|----------------------------------|
|                                                            |                     |                           |                                                                                   | Median (months) |            |                   |         | % at X years                                                                          |                                  |                   |                                                                                                                           |                                                                                                                           |                                                                                     |                                  |
|                                                            |                     |                           |                                                                                   | Relapse Free    | Event Free | Distant Mets-free | Overall | Relapse Free                                                                          | Event Free                       | Distant Mets-free | Overall                                                                                                                   |                                                                                                                           |                                                                                     |                                  |
| <b>Mammaprint: Randomized Controlled Trials</b>            |                     |                           |                                                                                   |                 |            |                   |         |                                                                                       |                                  |                   |                                                                                                                           |                                                                                                                           |                                                                                     |                                  |
| Cardoso et al, (NEJM 2016) <sup>2</sup>                    | CT<br>No CT         | Mammaprint                | High Risk (and treated with CT) 224<br><br>Low Risk (and not treated with CT) 636 | NR              | NR         | NR                | NR      | High Risk 5 year 92.7% (95%CI, 87.9–95.7)<br><br>HR 0.74 (95%CI, 0.40–1.39)<br>p=0.36 | Low Risk 97.3 (95%CI, 95.6–98.4) | NR                | High Risk 5-year 96.1% (95%CI, 92.4–98.1)<br><br>HR 0.90 (95%CI, 0.40–2.01)<br>p=0.80                                     | Low Risk 94.8% (95%CI, 92.6–96.3)                                                                                         | High Risk 5 year 98.1% (95%CI 94.9–99.3)<br><br>HR 0.72 (95%CI 0.23–2.24)<br>p=0.57 | Low Risk 97.3% (95%CI 95.6–98.4) |
| <b>Mammaprint: Prospective Studies</b>                     |                     |                           |                                                                                   |                 |            |                   |         |                                                                                       |                                  |                   |                                                                                                                           |                                                                                                                           |                                                                                     |                                  |
| Drukker et al, (Breast Cancer Res Treat 2014) <sup>9</sup> | CT<br>ET            | Mammaprint                | Low Risk: 115<br><br>High Risk: 180                                               | NR              | NR         | NR                | NR      | NR                                                                                    | NR                               | NR                | 5 years<br><br>High Risk 58.5% (95%CI, 51.6–66.4)<br><br>Low Risk 94.7% (95%CI, 90.7–98.9)<br><br>HR 9.6 (95%CI 4.2–22.1) | 5 years<br><br>High Risk 74.0% (95%CI, 67.8–80.7)<br><br>Low Risk 97.4% (95%CI, 94.5–100)<br><br>HR 11.3 (95%CI 3.5–36.4) |                                                                                     |                                  |
| <b>Mammaprint: Retrospective Studies</b>                   |                     |                           |                                                                                   |                 |            |                   |         |                                                                                       |                                  |                   |                                                                                                                           |                                                                                                                           |                                                                                     |                                  |
| Knauer et al, (Breast                                      | ET                  | MammaPrint                | 315 (58%)                                                                         | NR              | NR         | NR                | NR      | NR                                                                                    | NR                               | NR                | <u>Low risk:</u>                                                                                                          | <u>High risk:</u>                                                                                                         | <u>Low risk:</u>                                                                    | <u>High risk:</u>                |

| Author Year Reference                                                 | Treatments Compared            | Biomarker(s) Investigated | # and % of Pts.      | Survival        |            |                   |         |                               |            |                                                                                  |                                                                                      |                                     |                                     |
|-----------------------------------------------------------------------|--------------------------------|---------------------------|----------------------|-----------------|------------|-------------------|---------|-------------------------------|------------|----------------------------------------------------------------------------------|--------------------------------------------------------------------------------------|-------------------------------------|-------------------------------------|
|                                                                       |                                |                           |                      | Median (months) |            |                   |         | % at X years                  |            |                                                                                  |                                                                                      |                                     |                                     |
|                                                                       |                                |                           |                      | Relapse Free    | Event Free | Distant Mets-free | Overall | Relapse Free                  | Event Free | Distant Mets-free                                                                | Overall                                                                              |                                     |                                     |
| Cancer Res Treat 2010) <sup>8</sup><br><br>Pooled data from 6 studies | ET + CT                        |                           | 226 (42%)            |                 |            |                   |         |                               |            | 93%                                                                              | 76%                                                                                  | 97%                                 | 81%                                 |
|                                                                       |                                |                           |                      |                 |            |                   |         |                               |            | 99%                                                                              | 88%                                                                                  | 99%                                 | 94%                                 |
|                                                                       |                                |                           |                      |                 |            |                   |         |                               |            | HR: 0.26 (95%CI, 0.03-2.02; p=0.20)                                              | HR: 0.35 (95%CI, 0.17-0.71; p<0.01)                                                  | HR: 0.58 (95%CI, 0.07-4.98; p=0.62) | HR: 0.21 (95%CI, 0.07-0.59; p<0.01) |
| Buyse et al, (J Natl Cancer Inst 2006) <sup>4</sup>                   | NR                             | Mammaprint                | 307                  | NR              | NR         | NR                | NR      | HR 1.50 (95% CI 1.04 to 2.16) | NR         | NR                                                                               | NR                                                                                   | HR 2.79 (95% CI 1.60 to 4.87)       |                                     |
| Mook et al, (Breast Cancer Res Treat 2009) <sup>5</sup>               | ET<br>CT                       | Mammaprint                | 166<br>128           | NR              | NR         | NR                | NR      | NR                            | NR         | ET: HR 0.31 (95% CI, 0.12-0.80), p=0.02<br>CT: HR 0.64 (95%CI, 0.25-1.69) p=0.37 | ET: HR 0.36 (95% CI, 0.13–0.96) p = 0.04<br>CT: HR 0.80 (95% CI, 0.32–2.04) p = 0.64 |                                     |                                     |
| Bueno-de-Mesquita et al, (Breast Cancer Res Treat 2009) <sup>6</sup>  | None<br>Any systemic treatment | Mammaprint                | 78 (63%)<br>45 (37%) | NR              | NR         | NR                | NR      | NR                            | NR         | HR 1.2 (95% CI, 0.72-1.9) p=0.55                                                 | HR 1.2 (95% CI, 0.78-2.0) p=0.36                                                     |                                     |                                     |
| Knauer et al, (B J Cancer 2010) <sup>7</sup>                          | No chemotherapy or trastuzumab | Mammaprint                | 89 (53%)             | NR              | NR         | NR                | NR      | NR                            | NR         | HR 5.78 (95%CI, 1.25-26.66) p=0.025                                              | HR 4.70 (95% CI, 1.01-21.75) p=0.048                                                 |                                     |                                     |

Abbreviations: HR, hazard ratio; CI, confidence interval; OS, overall survival; HER2, human epidermal growth factor receptor 2; CT=Chemotherapy and Tamoxifen; ET=Endocrine Therapy; n.a.=Not Available; NR=Not Reported; ITT= intention-to-treat;

## REFERENCES

1. Teutsch SM, Bradley LA, Palomaki GE, et al: The Evaluation of Genomic Applications in Practice and Prevention (EGAPP) Initiative: methods of the EGAPP Working Group. *Genet Med* 11:3-14, 2009
2. Cardoso F, van't Veer LJ, Bogaerts J, et al: 70-Gene Signature as an Aid to Treatment Decisions in Early-Stage Breast Cancer. *N Engl J Med* 375:717-29, 2016
3. Simon RM, Paik S, Hayes DF: Use of archived specimens in evaluation of prognostic and predictive biomarkers. *J Natl Cancer Inst* 101:1446-1452, 2009
4. Buyse M, Loi S, van't Veer L, et al: Validation and clinical utility of a 70-gene prognostic signature for women with node-negative breast cancer. *J Natl Cancer Inst* 98:1183-92, 2006
5. Mook S, Schmidt MK, Viale G, et al: The 70-gene prognosis-signature predicts disease outcome in breast cancer patients with 1-3 positive lymph nodes in an independent validation study. *Breast Cancer Res Treat* 116:295-302, 2009
6. Bueno-de-Mesquita JM, Linn SC, Keijzer R, et al: Validation of 70-gene prognosis signature in node-negative breast cancer. *Breast Cancer Res Treat* 117:483-95, 2009
7. Knauer M, Cardoso F, Wesseling J, et al: Identification of a low-risk subgroup of HER-2-positive breast cancer by the 70-gene prognosis signature. *Br J Cancer* 103:1788-93, 2010
8. Knauer M, Mook S, Rutgers EJ, et al: The predictive value of the 70-gene signature for adjuvant chemotherapy in early breast cancer. *Breast Cancer Res Treat* 120:655-61, 2010
9. Drukker CA, van Tinteren H, Schmidt MK, et al: Long-term impact of the 70-gene signature on breast cancer outcome. *Breast Cancer Res Treat* 143:587-92, 2014
